# Supplementary material
Source: publisher site journal article supplement (https://www.dovepress.com/article/475953)

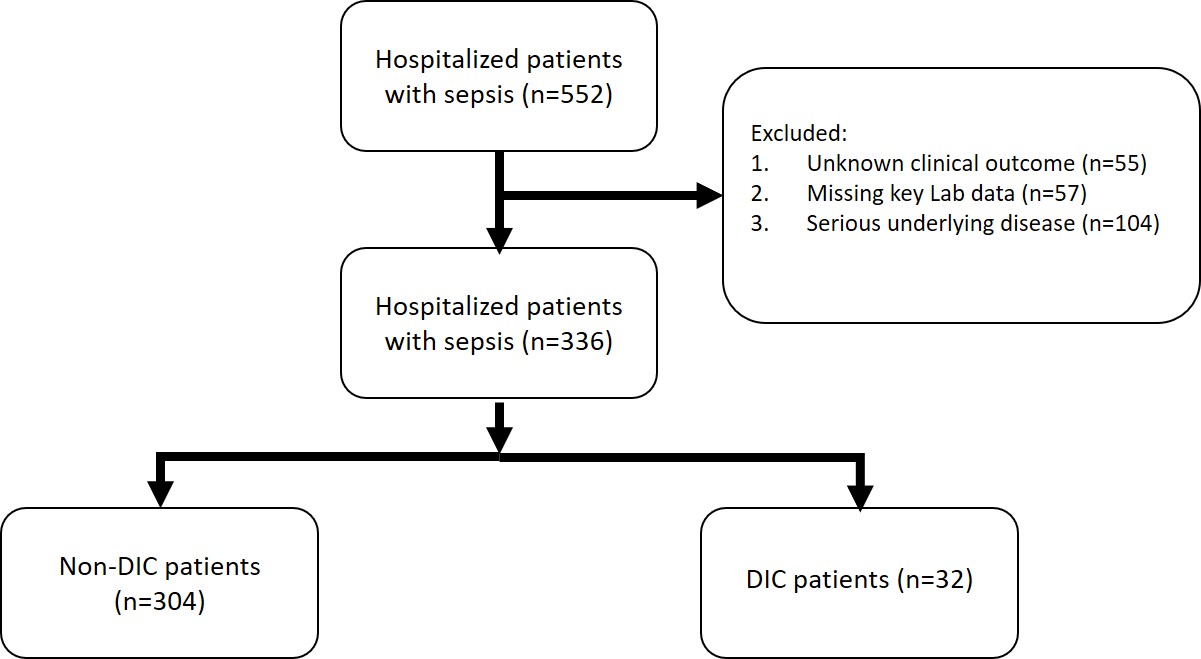


**Supplementary figure 1. The flow chart of the study.**

Supplement: Supplementary file 1 [file get_supplementary_file.php]
